# Supplementary material
Source: ML conference proceedings conference paper supplement (https://openreview.net/forum?id=ix1ctZID20)

# Cumulative Attack Cost

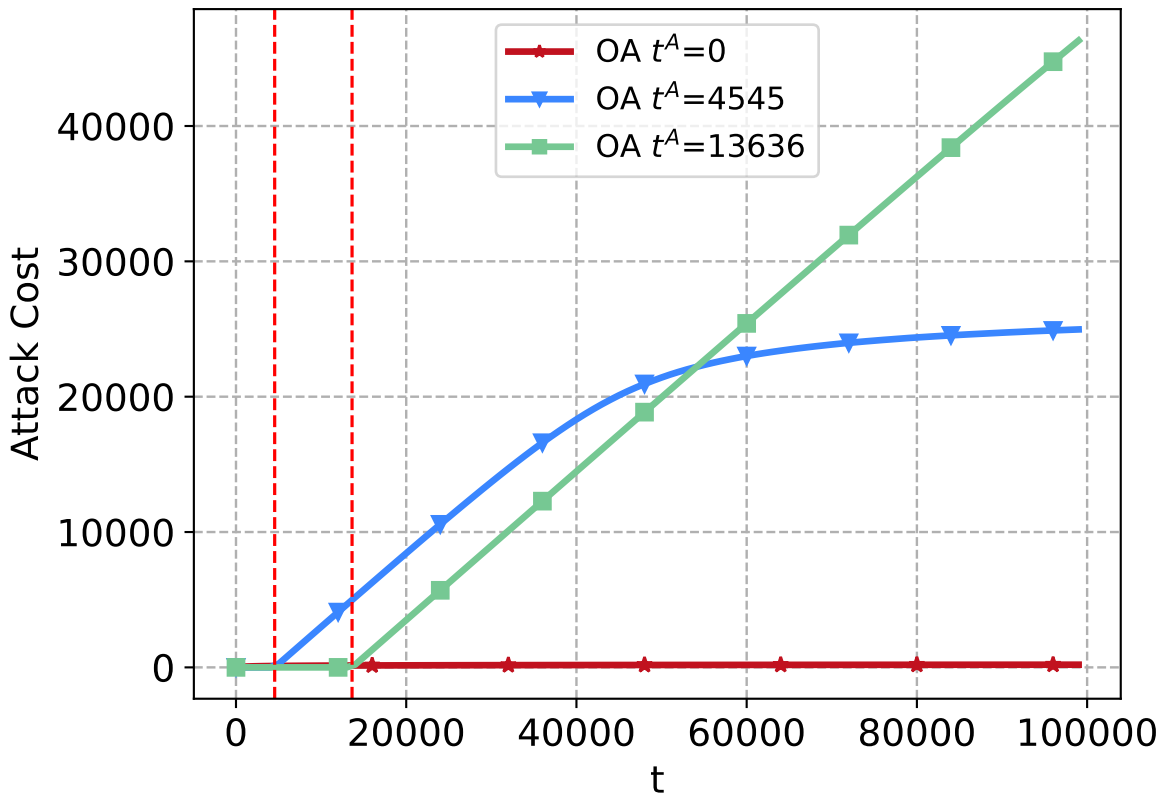

Supplement: supplementary_material [file comparison_attacks.pdf › code_delayed_adv_attacks/exps/comparison_attacks.pdf]

# Cumulative Regret

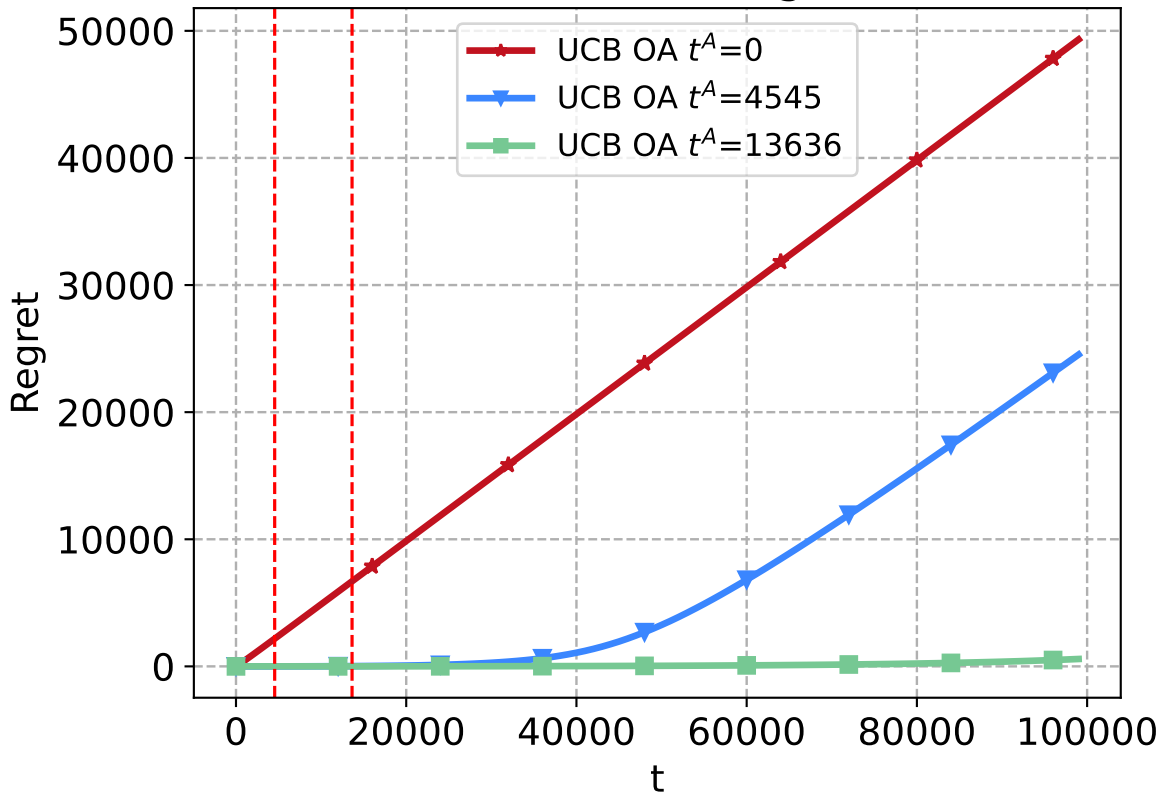

Supplement: supplementary_material [file comparison_regrets.pdf › code_delayed_adv_attacks/exps/comparison_regrets.pdf]

# Cumulative Rewards

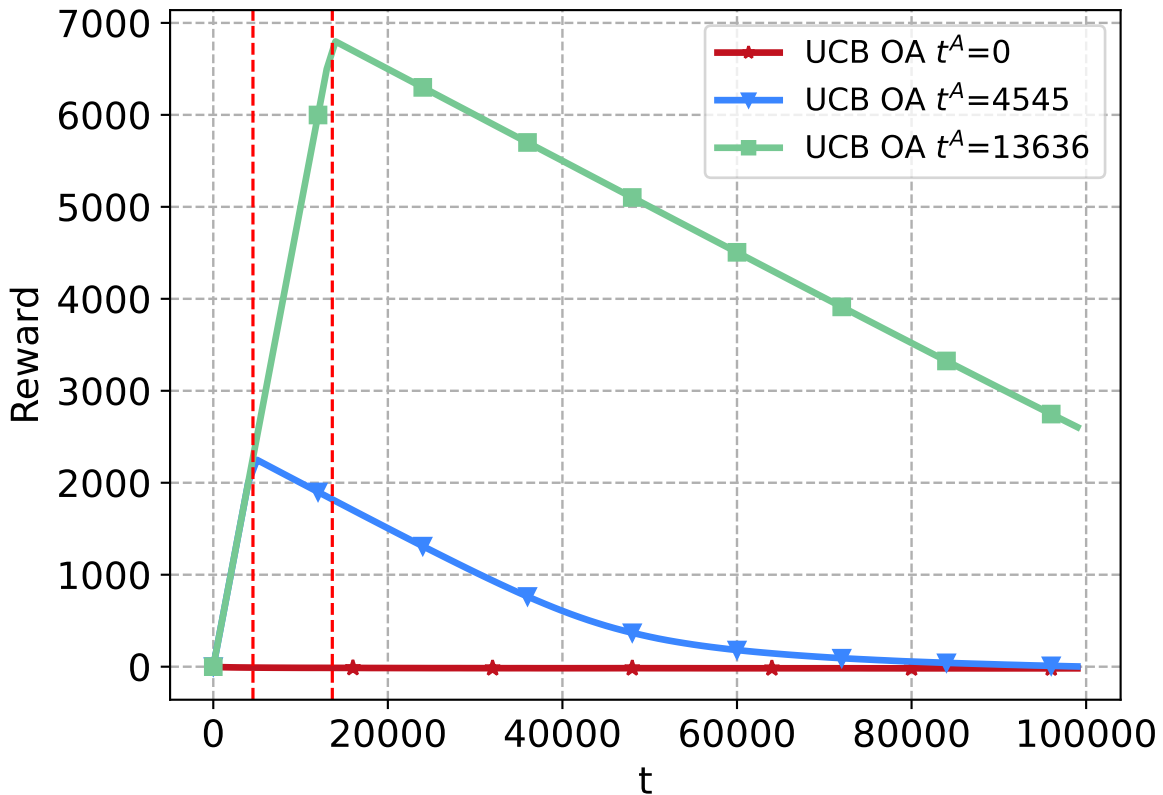

Supplement: supplementary_material [file comparison_rewards.pdf › code_delayed_adv_attacks/exps/comparison_rewards.pdf]

# Arm Pulls

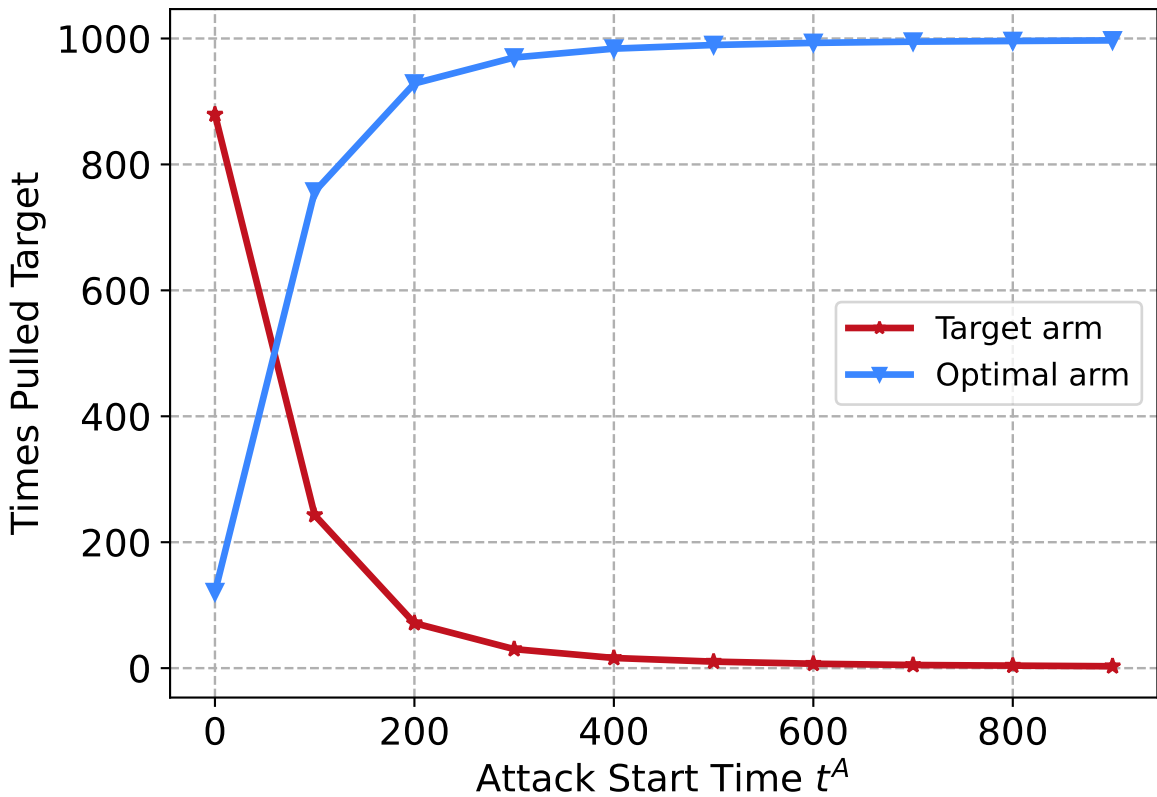

Supplement: supplementary_material [file different_start_armpull.pdf › code_delayed_adv_attacks/exps/different_start_armpull.pdf]

# Metrics Comparison

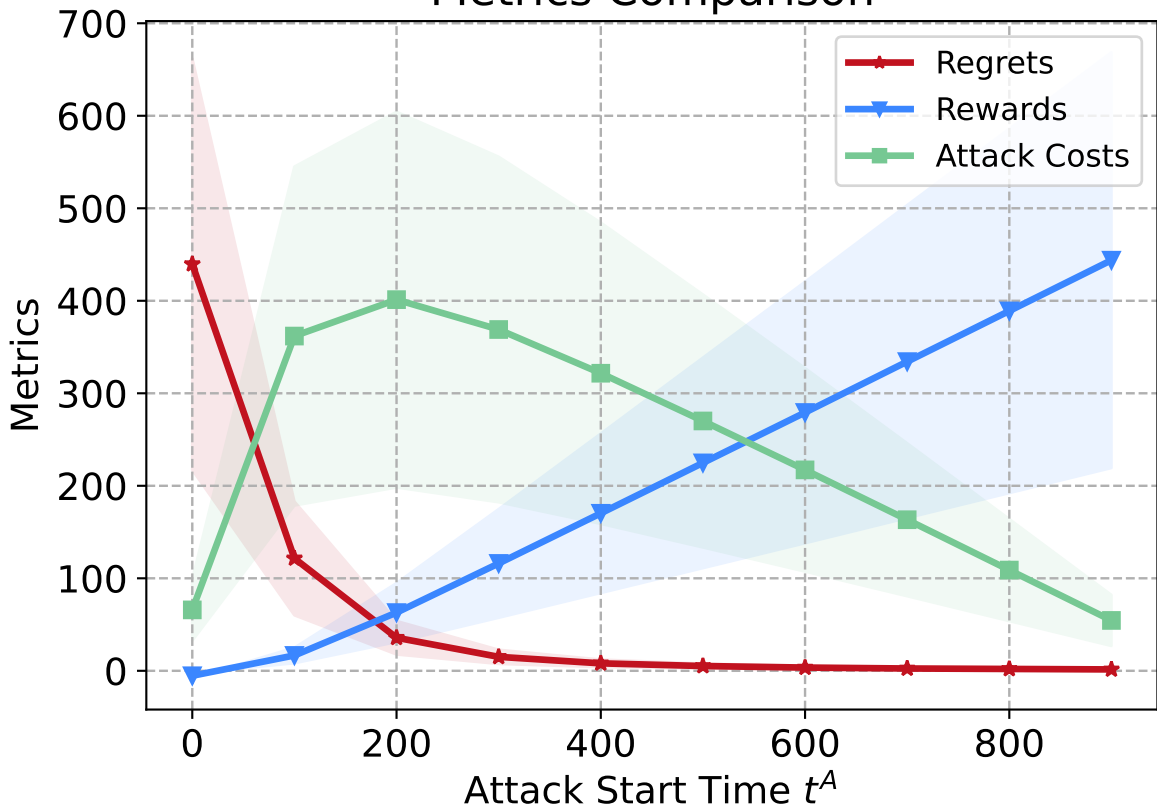

Supplement: supplementary_material [file different_start_metrics.pdf › code_delayed_adv_attacks/exps/different_start_metrics.pdf]
